# Supplementary material for: A distinct transition from cell growth to physiological homeostasis in the tendon
Source: PubMed Central journal article supplement (PMC6791717; doi:10.7554/elife.48689), 2019-09-19
Supplement: elife-48689-supp1.pdf [file elife-48689-supp1.pdf]

# Supplementary Table 1: RT-qPCR Statistics

*Grinstein et al.*

*April 23, 2019*

Supp. Table 1A: Ki67 ANOVA

|           | df | sum sq    | mean sq    | F statistic | p value      |
|-----------|----|-----------|------------|-------------|--------------|
| Timepoint | 5  | 71.751570 | 14.3503140 | 16.01767    | <b>2e-04</b> |
| Residuals | 10 | 8.959051  | 0.8959051  | NA          | NA           |

Supp. Table 1B: Ki67 Tukey's HSD

| comparison | estimate | conf. low | conf. high | adj. p value  |
|------------|----------|-----------|------------|---------------|
| P14-P0     | 0.6183   | -2.0660   | 3.3026     | 0.9611        |
| P21-P0     | 3.6772   | 0.9929    | 6.3615     | <b>0.0073</b> |
| P28-P0     | 2.1664   | -0.8347   | 5.1675     | 0.209         |
| P35-P0     | 5.9006   | 2.8994    | 8.9017     | <b>5e-04</b>  |
| P7-P0      | -0.3139  | -2.9982   | 2.3704     | 0.9981        |
| P21-P14    | 3.0589   | 0.3746    | 5.7432     | <b>0.024</b>  |
| P28-P14    | 1.5481   | -1.4531   | 4.5492     | 0.5103        |
| P35-P14    | 5.2822   | 2.2811    | 8.2834     | <b>0.0012</b> |
| P7-P14     | -0.9322  | -3.6165   | 1.7521     | 0.8247        |
| P28-P21    | -1.5108  | -4.5120   | 1.4903     | 0.5336        |
| P35-P21    | 2.2233   | -0.7778   | 5.2245     | 0.1906        |
| P7-P21     | -3.9911  | -6.6754   | -1.3068    | <b>0.0041</b> |
| P35-P28    | 3.7342   | 0.4466    | 7.0217     | <b>0.0244</b> |
| P7-P28     | -2.4803  | -5.4814   | 0.5209     | 0.1239        |
| P7-P35     | -6.2144  | -9.2156   | -3.2133    | <b>3e-04</b>  |

Supp. Table 1C: Scx ANOVA

|           | df | sum sq   | mean sq   | F statistic | p value       |
|-----------|----|----------|-----------|-------------|---------------|
| Timepoint | 5  | 82.31887 | 16.463773 | 7.513398    | <b>0.0021</b> |
| Residuals | 12 | 26.29506 | 2.191255  | NA          | NA            |

Supp. Table 1D: Scx Tukey's HSD

| comparison | estimate | conf. low | conf. high | adj. p value  |
|------------|----------|-----------|------------|---------------|
| P14-P0     | -4.7794  | -8.8392   | -0.7197    | <b>0.0183</b> |
| P21-P0     | -0.6600  | -4.7198   | 3.3998     | 0.9928        |
| P28-P0     | -1.4433  | -5.5031   | 2.6164     | 0.8315        |
| P35-P0     | 1.6778   | -2.3820   | 5.7375     | 0.7332        |
| P7-P0      | -3.4111  | -7.4709   | 0.6487     | 0.1206        |
| P21-P14    | 4.1194   | 0.0597    | 8.1792     | <b>0.046</b>  |
| P28-P14    | 3.3361   | -0.7237   | 7.3959     | 0.133         |
| P35-P14    | 6.4572   | 2.3975    | 10.5170    | <b>0.0019</b> |
| P7-P14     | 1.3683   | -2.6914   | 5.4281     | 0.859         |
| P28-P21    | -0.7833  | -4.8431   | 3.2764     | 0.9845        |
| P35-P21    | 2.3378   | -1.7220   | 6.3975     | 0.4285        |
| P7-P21     | -2.7511  | -6.8109   | 1.3087     | 0.2744        |
| P35-P28    | 3.1211   | -0.9387   | 7.1809     | 0.1753        |
| P7-P28     | -1.9678  | -6.0275   | 2.0920     | 0.5973        |
| P7-P35     | -5.0889  | -9.1487   | -1.0291    | <b>0.0119</b> |

Supp. Table 1E: Mlx ANOVA

|           | df | sum sq    | mean sq   | F statistic | p value      |
|-----------|----|-----------|-----------|-------------|--------------|
| Timepoint | 5  | 40.505138 | 8.1010277 | 9.78096     | <b>7e-04</b> |
| Residuals | 12 | 9.938935  | 0.8282446 | NA          | NA           |

Supp. Table 1F: Mlx Tukey's HSD

| comparison | estimate | conf. low | conf. high | adj. p value  |
|------------|----------|-----------|------------|---------------|
| P14-P0     | 0.3294   | -2.1665   | 2.8254     | 0.9973        |
| P21-P0     | 1.8628   | -0.6332   | 4.3587     | 0.1965        |
| P28-P0     | 1.9011   | -0.5948   | 4.3970     | 0.1818        |
| P35-P0     | 3.8550   | 1.3591    | 6.3509     | <b>0.0024</b> |
| P7-P0      | -0.6239  | -3.1198   | 1.8720     | 0.9539        |
| P21-P14    | 1.5333   | -0.9626   | 4.0293     | 0.365         |
| P28-P14    | 1.5717   | -0.9243   | 4.0676     | 0.3414        |
| P35-P14    | 3.5256   | 1.0296    | 6.0215     | <b>0.0049</b> |
| P7-P14     | -0.9533  | -3.4493   | 1.5426     | 0.7886        |
| P28-P21    | 0.0383   | -2.4576   | 2.5343     | 1             |
| P35-P21    | 1.9922   | -0.5037   | 4.4882     | 0.1506        |
| P7-P21     | -2.4867  | -4.9826   | 0.0093     | 0.0511        |
| P35-P28    | 1.9539   | -0.5420   | 4.4498     | 0.1631        |
| P7-P28     | -2.5250  | -5.0209   | -0.0291    | <b>0.0468</b> |
| P7-P35     | -4.4789  | -6.9748   | -1.9830    | <b>7e-04</b>  |

Supp. Table 1G: Colla2 ANOVA

|           | df | sum sq   | mean sq   | F statistic | p value      |
|-----------|----|----------|-----------|-------------|--------------|
| Timepoint | 5  | 57.78858 | 11.557716 | 12.75345    | <b>2e-04</b> |
| Residuals | 12 | 10.87490 | 0.906242  | NA          | NA           |

Supp. Table 1H: Colla2 Tukey's HSD

| comparison | estimate | conf. low | conf. high | adj. p value  |
|------------|----------|-----------|------------|---------------|
| P14-P0     | -0.7878  | -3.3986   | 1.8230     | 0.9047        |
| P21-P0     | 0.1978   | -2.4130   | 2.8086     | 0.9998        |
| P28-P0     | 0.0972   | -2.5136   | 2.7080     | 1             |
| P35-P0     | 4.0594   | 1.4486    | 6.6703     | <b>0.0023</b> |
| P7-P0      | -1.6511  | -4.2619   | 0.9597     | 0.3373        |
| P21-P14    | 0.9856   | -1.6253   | 3.5964     | 0.7961        |
| P28-P14    | 0.8850   | -1.7258   | 3.4958     | 0.8563        |
| P35-P14    | 4.8472   | 2.2364    | 7.4580     | <b>5e-04</b>  |
| P7-P14     | -0.8633  | -3.4741   | 1.7475     | 0.8679        |
| P28-P21    | -0.1006  | -2.7114   | 2.5103     | 1             |
| P35-P21    | 3.8617   | 1.2509    | 6.4725     | <b>0.0034</b> |
| P7-P21     | -1.8489  | -4.4597   | 0.7619     | 0.2372        |
| P35-P28    | 3.9622   | 1.3514    | 6.5730     | <b>0.0028</b> |
| P7-P28     | -1.7483  | -4.3591   | 0.8625     | 0.2849        |
| P7-P35     | -5.7106  | -8.3214   | -3.0997    | <b>1e-04</b>  |

Supp. Table 1I: Col3a1 ANOVA

|           | df | sum sq    | mean sq   | F statistic | p value      |
|-----------|----|-----------|-----------|-------------|--------------|
| Timepoint | 5  | 28.020784 | 5.6041568 | 15.16279    | <b>1e-04</b> |
| Residuals | 12 | 4.435193  | 0.3695994 | NA          | NA           |

Supp. Table 1J: Col3a1 Tukey's HSD

| comparison | estimate | conf. low | conf. high | adj. p value  |
|------------|----------|-----------|------------|---------------|
| P14-P0     | -0.1417  | -1.8090   | 1.5257     | 0.9997        |
| P21-P0     | 1.6956   | 0.0282    | 3.3629     | <b>0.0455</b> |
| P28-P0     | 0.8817   | -0.7857   | 2.5490     | 0.5133        |
| P35-P0     | 2.6350   | 0.9677    | 4.3023     | <b>0.002</b>  |
| P7-P0      | -1.1400  | -2.8073   | 0.5273     | 0.2667        |
| P21-P14    | 1.8372   | 0.1699    | 3.5045     | <b>0.0281</b> |
| P28-P14    | 1.0233   | -0.6440   | 2.6907     | 0.3659        |
| P35-P14    | 2.7767   | 1.1093    | 4.4440     | <b>0.0013</b> |
| P7-P14     | -0.9983  | -2.6657   | 0.6690     | 0.39          |
| P28-P21    | -0.8139  | -2.4812   | 0.8534     | 0.5907        |
| P35-P21    | 0.9394   | -0.7279   | 2.6068     | 0.4502        |
| P7-P21     | -2.8356  | -4.5029   | -1.1682    | <b>0.0011</b> |
| P35-P28    | 1.7533   | 0.0860    | 3.4207     | <b>0.0374</b> |
| P7-P28     | -2.0217  | -3.6890   | -0.3543    | <b>0.015</b>  |
| P7-P35     | -3.7750  | -5.4423   | -2.1077    | <b>1e-04</b>  |

Supp. Table 1K: Fmod ANOVA

|           | df | sum sq   | mean sq  | F statistic | p value       |
|-----------|----|----------|----------|-------------|---------------|
| Timepoint | 5  | 23.67170 | 4.734340 | 3.998559    | <b>0.0229</b> |
| Residuals | 12 | 14.20814 | 1.184012 | NA          | NA            |

Supp. Table 1L: Fmod Tukey's HSD

| comparison | estimate | conf. low | conf. high | adj. p value |
|------------|----------|-----------|------------|--------------|
| P14-P0     | -2.8639  | -5.8481   | 0.1203     | 0.0627       |
| P21-P0     | -2.3533  | -5.3376   | 0.6309     | 0.1583       |
| P28-P0     | -2.4367  | -5.4209   | 0.5476     | 0.1368       |
| P35-P0     | -0.5256  | -3.5098   | 2.4587     | 0.9897       |
| P7-P0      | -2.8933  | -5.8776   | 0.0909     | 0.0593       |
| P21-P14    | 0.5106   | -2.4737   | 3.4948     | 0.991        |
| P28-P14    | 0.4272   | -2.5570   | 3.4115     | 0.996        |
| P35-P14    | 2.3383   | -0.6459   | 5.3226     | 0.1625       |
| P7-P14     | -0.0294  | -3.0137   | 2.9548     | 1            |
| P28-P21    | -0.0833  | -3.0676   | 2.9009     | 1            |
| P35-P21    | 1.8278   | -1.1565   | 4.8120     | 0.368        |
| P7-P21     | -0.5400  | -3.5242   | 2.4442     | 0.9884       |
| P35-P28    | 1.9111   | -1.0731   | 4.8953     | 0.3256       |
| P7-P28     | -0.4567  | -3.4409   | 2.5276     | 0.9946       |
| P7-P35     | -2.3678  | -5.3520   | 0.6165     | 0.1544       |
